# Supplementary material
Source: publisher site journal article supplement (https://www.dovepress.com/article/461640)
Supplement: Supplementary file 1 [file get_supplementary_file.php]

**Table S1 Traits and reasons of excluded SNPs**

| Excluded SNPs | Trait                                                                                                                                                                                                                                                                                                                                                                                                                                                                                                                                                                                                                                                                                                                                                                                                                                                                                                                                                                                                                                                                                                                                                 | Reason                                                                                                                                                                     | PMID                                                                                                                          |
|---------------|-------------------------------------------------------------------------------------------------------------------------------------------------------------------------------------------------------------------------------------------------------------------------------------------------------------------------------------------------------------------------------------------------------------------------------------------------------------------------------------------------------------------------------------------------------------------------------------------------------------------------------------------------------------------------------------------------------------------------------------------------------------------------------------------------------------------------------------------------------------------------------------------------------------------------------------------------------------------------------------------------------------------------------------------------------------------------------------------------------------------------------------------------------|----------------------------------------------------------------------------------------------------------------------------------------------------------------------------|-------------------------------------------------------------------------------------------------------------------------------|
| rs597808      | Diastolic blood pressure x alcohol consumption interaction; Systemic lupus erythematosus; Hematocrit; Smoking status (ever vs never smokers); Apolipoprotein B levels; Low density lipoprotein cholesterol levels; LDL cholesterol levels; Allergic disease (asthma, hay fever and/or eczema) (age of onset); Lymphocyte Absolute Count; Colorectal cancer; Colorectal cancer; Hemoglobin; Whole brain restricted isotropic diffusion (multivariate analysis); Lymphocyte-to-monocyte ratio; Diastolic blood pressure; Total cholesterol levels; Mean corpuscular hemoglobin; Total cholesterol levels; Low-density lipoprotein levels (MTAG); Waist-hip ratio; High-density lipoprotein levels (MTAG); Colorectal cancer or advanced adenoma; Gastroesophageal reflux disease; Systolic blood pressure x alcohol consumption interaction (2df test); Hemoglobin concentration; Hemoglobin concentration; Allergic rhinitis; Hypothyroidism                                                                                                                                                                                                           | This SNP is associated with blood pressure, thyroid function, BMI and other factors, which have been confirmed to be associated with a variety of pregnancy complications. | 27094586;<br>34752500;<br>31932287;<br>34392166;<br>35255260;<br>31002708;<br>26665567;<br>26837268;<br>10447017;<br>31429897 |
| rs6679677     | Anti-neutrophil antibody associated vasculitis; systemic juvenile idiopathic arthritis, polyarticular juvenile idiopathic arthritis, rheumatoid factor negative, oligoarticular juvenile idiopathic arthritis; monokine induced by gamma interferon measurement; obsolete_systemic lupus erythematosus; event free survival time, type 1 diabetes mellitus, autoantibody measurement; event free survival time, type 1 diabetes mellitus, autoantibody measurement; basophil percentage of leukocytes; systemic scleroderma, rheumatoid arthritis, myositis, obsolete_systemic lupus erythematosus; autoimmune thyroid disease, obsolete_common variable immunodeficiency, type 1 diabetes mellitus, ankylosing spondylitis, psoriasis, celiac disease, obsolete_systemic lupus erythematosus, ulcerative colitis, Crohn's disease, autoimmune disease, juvenile idiopathic arthritis; rheumatoid arthritis, celiac disease; type 1 diabetes mellitus; rheumatoid arthritis; type 1 diabetes mellitus; rheumatoid arthritis; type 1 diabetes mellitus; temporal arteritis; keratinocyte carcinoma; hypothyroidism; Crohn's disease; obsolete_systemic | In addition to SLE, this SNP is also associated with a variety of immune systemic diseases. It has also been confirmed to be associated with diabetes, so it was excluded. | 36578485;<br>30189769;<br>31776579;<br>29356835;<br>33803995                                                                  |

|            |                                                                                                                                                                                                                                                                                                                                                                                                                                                                                                                                  |                                                                                                                             |                                             |
|------------|----------------------------------------------------------------------------------------------------------------------------------------------------------------------------------------------------------------------------------------------------------------------------------------------------------------------------------------------------------------------------------------------------------------------------------------------------------------------------------------------------------------------------------|-----------------------------------------------------------------------------------------------------------------------------|---------------------------------------------|
|            | <p>lupus erythematosus; juvenile idiopathic arthritis; rheumatoid arthritis, ulcerative colitis; monocyte count; neutrophil count; Immunosuppressant use measurement; lymphocyte count; rheumatoid arthritis; rheumatoid arthritis; rheumatoid arthritis, ACPA-positive rheumatoid arthritis, rheumatoid factor seropositivity measurement; alkaline phosphatase measurement; platelet-to-lymphocyte ratio; non-melanoma skin carcinoma; neutrophil count; juvenile idiopathic arthritis; Immunosuppressant use measurement;</p> |                                                                                                                             |                                             |
| rs389884   | <p>Idiopathic membranous nephropathy; Hematology traits; Sarcoidosis (Lofgren's syndrome vs non-Lofgren's syndrome); Serum levels of protein FTMT; Inguinal hernia</p>                                                                                                                                                                                                                                                                                                                                                           | <p>Kidney disease may lead to nephrogenic hypertension, which in turn affects pregnancy.</p>                                | <p>34392166;<br/>32097941</p>               |
| rs58721818 | <p>Rheumatoid arthritis (ACPA-positive); Systemic lupus erythematosus; Systemic seropositive rheumatic diseases (Systemic sclerosis or systemic lupus erythematosus or rheumatoid arthritis or idiopathic inflammatory myopathies); Autoimmune traits (pleiotropy); Rheumatoid arthritis</p>                                                                                                                                                                                                                                     | <p>This SNP is associated with RA. RA has been shown to be a high risk factor for a variety of pregnancy complications.</p> | <p>31776579;<br/>30189769;<br/>36578485</p> |
| rs7097397  | <p>Systemic lupus erythematosus; Rheumatoid arthritis; Primary biliary cholangitis</p>                                                                                                                                                                                                                                                                                                                                                                                                                                           | <p>This SNP is associated with RA. RA has been shown to be a high risk factor for a variety of pregnancy complications.</p> |                                             |

**Table S2 Characteristics of each method used in this study**

| <b>Method</b>             | <b>Characteristic</b>                                                                                                                                                                                                                                                                                                                                                |
|---------------------------|----------------------------------------------------------------------------------------------------------------------------------------------------------------------------------------------------------------------------------------------------------------------------------------------------------------------------------------------------------------------|
| Inverse-variance weighted | The IVW method was primarily employed for fundamental causal estimates, which would provide the most precise results when all selected SNPs were valid IVs. The IVW method calculates a weighted average of Wald ratio estimates.                                                                                                                                    |
| MR-Egger                  | Under the assumption of Instrument Strength Independent of Direct Effect (InSIDE), the MR-Egger regression executes a weighted linear regression and yields a consistent causal estimate, even though the genetic IVs are all invalid. (It exhibits low precision and is susceptible to outlying genetic variants).                                                  |
| Weighted median           | The Weighted Median regression method, which does not demand the InSIDE hypothesis, calculates a weighted median of the Wald ratio estimates and is robust to horizontal pleiotropic bias. It is confirmed that the Weighted Median method has some advantages over the MR-Egger regression, as it provides lower type I error and higher causal estimate power.     |
| Weighted Mode             | The Weighted Mode method estimates the causal effect of the subset with the largest number of SNPs by clustering the SNPs into subsets resting on the resemblance of causal effects.                                                                                                                                                                                 |
| Maximum likelihood        | The ML method is similar to IVW, assuming that heterogeneity and horizontal pleiotropy do not exist. If the hypotheses are satisfied, the results will be unbiased, and the standard errors will be smaller than IVW.                                                                                                                                                |
| MR-PRESSO                 | The MR Pleiotropy REsidual Sum and Outlier (MR-PRESSO) test was additionally conducted to evaluate whether pleiotropy was present. Its functions include detecting horizontal pleiotropy, correcting for horizontal pleiotropy by removing outlier, and determining whether there are substantial variations in the causal effects before and after outlier removal. |

**Table S3 Mendelian randomization analysis of Systemic lupus erythematosus and gestational diabetes mellitus.**

| SNP         | A1 | A2 | EAF   | Systemic lupus erythematosus |       |          |                |          | Gestational diabetes mellitus |          |          |
|-------------|----|----|-------|------------------------------|-------|----------|----------------|----------|-------------------------------|----------|----------|
|             |    |    |       | Beta                         | SE    | P-val    | R <sup>2</sup> | F        | Beta                          | SE       | P-val    |
| rs10048743  | T  | G  | 0.137 | -0.231                       | 0.041 | 2.04E-08 | 0.013          | 296.577  | 0.009625                      | 0.018269 | 0.598303 |
| rs10200680  | T  | C  | 0.143 | -0.248                       | 0.042 | 4.96E-09 | 0.015          | 355.210  | 0.020738                      | 0.018686 | 0.267074 |
| rs1078324   | A  | C  | 0.051 | -0.713                       | 0.078 | 7.11E-20 | 0.049          | 1201.152 | 0.024159                      | 0.035024 | 0.490335 |
| rs10912578  | G  | A  | 0.682 | -0.247                       | 0.031 | 1.65E-15 | 0.026          | 630.842  | -0.02233                      | 0.01512  | 0.139713 |
| rs12094036  | C  | T  | 0.923 | -0.329                       | 0.058 | 1.37E-08 | 0.015          | 362.648  | -0.02176                      | 0.024372 | 0.372046 |
| rs12524498  | T  | G  | 0.019 | -0.673                       | 0.121 | 2.48E-08 | 0.017          | 398.580  | 0.005189                      | 0.050624 | 0.918358 |
| rs13136219  | T  | C  | 0.377 | -0.174                       | 0.028 | 3.50E-10 | 0.014          | 334.824  | 0.005826                      | 0.014598 | 0.68982  |
| rs13332649  | G  | A  | 0.783 | -0.315                       | 0.038 | 5.43E-17 | 0.034          | 809.854  | 0.006998                      | 0.015595 | 0.653633 |
| rs1464446   | T  | G  | 0.183 | -0.329                       | 0.04  | 2.79E-16 | 0.032          | 776.286  | -0.02131                      | 0.018523 | 0.249977 |
| rs150180633 | T  | C  | 0.014 | 0.928                        | 0.069 | 2.66E-41 | 0.024          | 565.222  | 0.221514                      | 0.114274 | 0.052569 |
| rs17849501  | T  | C  | 0.051 | 0.811                        | 0.05  | 1.81E-59 | 0.064          | 1578.029 | 0.000292                      | 0.036473 | 0.993612 |
| rs2431697   | C  | T  | 0.561 | -0.223                       | 0.029 | 2.60E-14 | 0.024          | 582.740  | -0.00755                      | 0.014417 | 0.600358 |
| rs2459611   | T  | C  | 0.107 | 0.261                        | 0.045 | 7.62E-09 | 0.013          | 306.108  | -0.01304                      | 0.031674 | 0.680586 |
| rs2573219   | C  | A  | 0.907 | 0.588                        | 0.043 | 1.13E-42 | 0.058          | 1437.516 | 0.00798                       | 0.025391 | 0.753297 |
| rs268124    | T  | C  | 0.269 | 0.186                        | 0.032 | 8.60E-09 | 0.014          | 320.120  | 0.001641                      | 0.014505 | 0.909907 |
| rs34703115  | C  | T  | 0.968 | -0.616                       | 0.105 | 4.08E-09 | 0.024          | 558.709  | -0.00346                      | 0.038187 | 0.927855 |
| rs35000415  | T  | C  | 0.114 | 0.588                        | 0.042 | 1.86E-45 | 0.070          | 1742.628 | 0.022216                      | 0.019623 | 0.257588 |
| rs35251378  | A  | G  | 0.291 | -0.236                       | 0.032 | 3.61E-13 | 0.023          | 545.919  | -0.01637                      | 0.015951 | 0.304617 |
| rs353608    | G  | A  | 0.528 | 0.186                        | 0.028 | 2.93E-11 | 0.017          | 407.215  | -0.01317                      | 0.014024 | 0.347495 |
| rs3747093   | A  | G  | 0.212 | 0.262                        | 0.035 | 2.88E-14 | 0.023          | 544.765  | 0.014417                      | 0.015213 | 0.343313 |
| rs4388254   | T  | C  | 0.049 | 0.378                        | 0.06  | 3.71E-10 | 0.013          | 313.220  | 0.012529                      | 0.022187 | 0.57229  |
| rs4661543   | G  | T  | 0.874 | 0.274                        | 0.042 | 9.40E-11 | 0.017          | 390.204  | 0.033691                      | 0.028085 | 0.230284 |
| rs4916215   | T  | C  | 0.264 | 0.223                        | 0.034 | 5.07E-11 | 0.019          | 457.335  | 0.036145                      | 0.018089 | 0.045692 |
| rs58688157  | G  | A  | 0.738 | -0.223                       | 0.034 | 2.97E-11 | 0.019          | 455.060  | -0.02943                      | 0.017379 | 0.09034  |
| rs6671847   | A  | G  | 0.48  | 0.199                        | 0.029 | 6.64E-12 | 0.020          | 468.048  | 0.003283                      | 0.014089 | 0.815731 |
| rs6889239   | C  | T  | 0.747 | 0.278                        | 0.032 | 2.19E-18 | 0.029          | 698.351  | 0.006941                      | 0.015536 | 0.655019 |
| rs73050535  | T  | C  | 0.022 | -0.713                       | 0.124 | 9.11E-09 | 0.022          | 519.056  | -0.00278                      | 0.098684 | 0.977503 |
| rs73068668  | A  | G  | 0.076 | -0.315                       | 0.057 | 4.40E-08 | 0.014          | 327.997  | -0.03002                      | 0.025575 | 0.240487 |
| rs7768653   | T  | C  | 0.398 | -0.207                       | 0.03  | 3.11E-12 | 0.021          | 486.517  | -0.00117                      | 0.014237 | 0.934775 |
| rs7823055   | T  | G  | 0.424 | -0.351                       | 0.029 | 1.64E-34 | 0.060          | 1486.019 | -0.02494                      | 0.01415  | 0.078012 |
| rs9852014   | G  | A  | 0.926 | 0.621                        | 0.049 | 2.26E-36 | 0.053          | 1295.017 | 0.00515                       | 0.025905 | 0.842417 |

**Table S4 Mendelian randomization analysis of Systemic lupus erythematosus and preeclampsia-eclampsia.**

| SNP         | A1 | A2 | EAF   | Systemic lupus erythematosus |       |          | Preeclampsia-eclampsia |          |          |
|-------------|----|----|-------|------------------------------|-------|----------|------------------------|----------|----------|
|             |    |    |       | Beta                         | SE    | P-val    | Beta                   | SE       | P-val    |
| rs10048743  | T  | G  | 0.137 | -0.231                       | 0.041 | 2.04E-08 | 0.005716               | 0.023428 | 0.807232 |
| rs10200680  | T  | C  | 0.143 | -0.248                       | 0.042 | 4.96E-09 | 0.033454               | 0.023927 | 0.162064 |
| rs1078324   | A  | C  | 0.051 | -0.713                       | 0.078 | 7.11E-20 | -0.06477               | 0.045369 | 0.153402 |
| rs10912578  | G  | A  | 0.682 | -0.247                       | 0.031 | 1.65E-15 | 0.004533               | 0.019392 | 0.815169 |
| rs12094036  | C  | T  | 0.923 | -0.329                       | 0.058 | 1.37E-08 | -0.02816               | 0.031165 | 0.366154 |
| rs12524498  | T  | G  | 0.019 | -0.673                       | 0.121 | 2.48E-08 | -0.04805               | 0.064805 | 0.458376 |
| rs13136219  | T  | C  | 0.377 | -0.174                       | 0.028 | 3.50E-10 | -0.00974               | 0.018704 | 0.602704 |
| rs13332649  | G  | A  | 0.783 | -0.315                       | 0.038 | 5.43E-17 | -0.01584               | 0.02005  | 0.429589 |
| rs1464446   | T  | G  | 0.183 | -0.329                       | 0.04  | 2.79E-16 | -0.00336               | 0.023755 | 0.887373 |
| rs150180633 | T  | C  | 0.014 | 0.928                        | 0.069 | 2.66E-41 | -0.08987               | 0.147357 | 0.541947 |
| rs17849501  | T  | C  | 0.051 | 0.811                        | 0.05  | 1.81E-59 | -0.00096               | 0.046817 | 0.983699 |
| rs2431697   | C  | T  | 0.561 | -0.223                       | 0.029 | 2.60E-14 | 0.01095                | 0.018496 | 0.553823 |
| rs2459611   | T  | C  | 0.107 | 0.261                        | 0.045 | 7.62E-09 | 0.084573               | 0.040736 | 0.037881 |
| rs2573219   | C  | A  | 0.907 | 0.588                        | 0.043 | 1.13E-42 | 0.040927               | 0.032574 | 0.208971 |
| rs268124    | T  | C  | 0.269 | 0.186                        | 0.032 | 8.60E-09 | -0.00111               | 0.018596 | 0.952402 |
| rs34703115  | C  | T  | 0.968 | -0.616                       | 0.105 | 4.08E-09 | -0.03521               | 0.049227 | 0.474441 |
| rs35000415  | T  | C  | 0.114 | 0.588                        | 0.042 | 1.86E-45 | 0.021733               | 0.025126 | 0.387068 |
| rs35251378  | A  | G  | 0.291 | -0.236                       | 0.032 | 3.61E-13 | -0.01245               | 0.020522 | 0.544023 |
| rs353608    | G  | A  | 0.528 | 0.186                        | 0.028 | 2.93E-11 | -0.0081                | 0.018014 | 0.652904 |
| rs4388254   | T  | C  | 0.049 | 0.378                        | 0.06  | 3.71E-10 | -0.00677               | 0.028446 | 0.811789 |
| rs4661543   | G  | T  | 0.874 | 0.274                        | 0.042 | 9.40E-11 | -0.00512               | 0.036337 | 0.887915 |
| rs4916215   | T  | C  | 0.264 | 0.223                        | 0.034 | 5.07E-11 | -0.00978               | 0.023282 | 0.674335 |
| rs58688157  | G  | A  | 0.738 | -0.223                       | 0.034 | 2.97E-11 | 0.010517               | 0.022384 | 0.638459 |
| rs6671847   | A  | G  | 0.48  | 0.199                        | 0.029 | 6.64E-12 | 0.011963               | 0.018087 | 0.508362 |
| rs6889239   | C  | T  | 0.747 | 0.278                        | 0.032 | 2.19E-18 | -0.01652               | 0.019969 | 0.408067 |
| rs73050535  | T  | C  | 0.022 | -0.713                       | 0.124 | 9.11E-09 | -0.16493               | 0.12813  | 0.198022 |
| rs7768653   | T  | C  | 0.398 | -0.207                       | 0.03  | 3.11E-12 | 0.014995               | 0.018241 | 0.411052 |
| rs7823055   | T  | G  | 0.424 | -0.351                       | 0.029 | 1.64E-34 | 0.01959                | 0.018157 | 0.280636 |
| rs9852014   | G  | A  | 0.926 | 0.621                        | 0.049 | 2.26E-36 | -0.02337               | 0.033193 | 0.481332 |

**Table S5 Mendelian randomization analysis of Systemic lupus erythematosus and premature rupture of membranes.**

| SNP         | A1 | A2 | EAF   | Systemic lupus erythematosus |       |          | Premature rupture of membranes |          |          |
|-------------|----|----|-------|------------------------------|-------|----------|--------------------------------|----------|----------|
|             |    |    |       | Beta                         | SE    | P-val    | Beta                           | SE       | P-val    |
| rs10048743  | T  | G  | 0.137 | -0.231                       | 0.041 | 2.04E-08 | 0.006133                       | 0.024507 | 0.802399 |
| rs10200680  | T  | C  | 0.143 | -0.248                       | 0.042 | 4.96E-09 | 0.014457                       | 0.025154 | 0.56546  |
| rs1078324   | A  | C  | 0.051 | -0.713                       | 0.078 | 7.11E-20 | -0.04237                       | 0.046615 | 0.363398 |
| rs10912578  | G  | A  | 0.682 | -0.247                       | 0.031 | 1.65E-15 | 0.024504                       | 0.020241 | 0.226051 |
| rs12094036  | C  | T  | 0.923 | -0.329                       | 0.058 | 1.37E-08 | 0.013251                       | 0.03267  | 0.685045 |
| rs12524498  | T  | G  | 0.019 | -0.673                       | 0.121 | 2.48E-08 | 0.073457                       | 0.067394 | 0.275727 |
| rs13136219  | T  | C  | 0.377 | -0.174                       | 0.028 | 3.50E-10 | -0.01014                       | 0.019541 | 0.603919 |
| rs13332649  | G  | A  | 0.783 | -0.315                       | 0.038 | 5.43E-17 | 0.000213                       | 0.020912 | 0.991888 |
| rs1464446   | T  | G  | 0.183 | -0.329                       | 0.04  | 2.79E-16 | -0.00744                       | 0.02477  | 0.763802 |
| rs150180633 | T  | C  | 0.014 | 0.928                        | 0.069 | 2.66E-41 | 0.155524                       | 0.150131 | 0.300238 |
| rs17849501  | T  | C  | 0.051 | 0.811                        | 0.05  | 1.81E-59 | 0.089289                       | 0.049099 | 0.068978 |
| rs2431697   | C  | T  | 0.561 | -0.223                       | 0.029 | 2.60E-14 | -0.00492                       | 0.019303 | 0.798668 |
| rs2459611   | T  | C  | 0.107 | 0.261                        | 0.045 | 7.62E-09 | 0.056084                       | 0.04237  | 0.185612 |
| rs2573219   | C  | A  | 0.907 | 0.588                        | 0.043 | 1.13E-42 | 0.022933                       | 0.033975 | 0.499671 |
| rs268124    | T  | C  | 0.269 | 0.186                        | 0.032 | 8.60E-09 | 0.000157                       | 0.019429 | 0.993552 |
| rs34703115  | C  | T  | 0.968 | -0.616                       | 0.105 | 4.08E-09 | -0.07316                       | 0.050749 | 0.149419 |
| rs35000415  | T  | C  | 0.114 | 0.588                        | 0.042 | 1.86E-45 | 0.060834                       | 0.026175 | 0.020121 |
| rs35251378  | A  | G  | 0.291 | -0.236                       | 0.032 | 3.61E-13 | -0.01575                       | 0.021312 | 0.459896 |
| rs353608    | G  | A  | 0.528 | 0.186                        | 0.028 | 2.93E-11 | 0.047453                       | 0.018797 | 0.011587 |
| rs3747093   | A  | G  | 0.212 | 0.262                        | 0.035 | 2.88E-14 | -0.0158                        | 0.020406 | 0.438827 |
| rs4388254   | T  | C  | 0.049 | 0.378                        | 0.06  | 3.71E-10 | -0.00135                       | 0.029613 | 0.96356  |
| rs4661543   | G  | T  | 0.874 | 0.274                        | 0.042 | 9.40E-11 | -0.02242                       | 0.037636 | 0.551437 |
| rs4916215   | T  | C  | 0.264 | 0.223                        | 0.034 | 5.07E-11 | 0.034097                       | 0.02419  | 0.158684 |
| rs58688157  | G  | A  | 0.738 | -0.223                       | 0.034 | 2.97E-11 | 0.014694                       | 0.023243 | 0.527252 |
| rs6671847   | A  | G  | 0.48  | 0.199                        | 0.029 | 6.64E-12 | 0.016843                       | 0.018846 | 0.371473 |
| rs6889239   | C  | T  | 0.747 | 0.278                        | 0.032 | 2.19E-18 | -0.01606                       | 0.020784 | 0.439764 |
| rs73050535  | T  | C  | 0.022 | -0.713                       | 0.124 | 9.11E-09 | -0.1249                        | 0.129485 | 0.334769 |
| rs73068668  | A  | G  | 0.076 | -0.315                       | 0.057 | 4.40E-08 | 0.003548                       | 0.034349 | 0.917728 |
| rs7768653   | T  | C  | 0.398 | -0.207                       | 0.03  | 3.11E-12 | 0.030248                       | 0.019066 | 0.112623 |
| rs7823055   | T  | G  | 0.424 | -0.351                       | 0.029 | 1.64E-34 | -0.02883                       | 0.018951 | 0.128153 |
| rs9852014   | G  | A  | 0.926 | 0.621                        | 0.049 | 2.26E-36 | -0.0224                        | 0.034582 | 0.517242 |

**Table S6 Mendelian randomization analysis of Systemic lupus erythematosus and polyhydramnios.**

| SNP         | A1 | A2 | EAF   | Systemic lupus erythematosus |       |          | Polyhydramnios |          |          |
|-------------|----|----|-------|------------------------------|-------|----------|----------------|----------|----------|
|             |    |    |       | Beta                         | SE    | P-val    | Beta           | SE       | P-val    |
| rs10048743  | T  | G  | 0.137 | -0.231                       | 0.041 | 2.04E-08 | 0.039275       | 0.057428 | 0.494042 |
| rs10200680  | T  | C  | 0.143 | -0.248                       | 0.042 | 4.96E-09 | 0.069687       | 0.058502 | 0.233579 |
| rs1078324   | A  | C  | 0.051 | -0.713                       | 0.078 | 7.11E-20 | 0.000592       | 0.111033 | 0.995743 |
| rs10912578  | G  | A  | 0.682 | -0.247                       | 0.031 | 1.65E-15 | 0.016346       | 0.047595 | 0.731274 |
| rs12094036  | C  | T  | 0.923 | -0.329                       | 0.058 | 1.37E-08 | -0.06628       | 0.076466 | 0.386082 |
| rs12524498  | T  | G  | 0.019 | -0.673                       | 0.121 | 2.48E-08 | -0.13001       | 0.158298 | 0.411476 |
| rs13136219  | T  | C  | 0.377 | -0.174                       | 0.028 | 3.50E-10 | 0.007303       | 0.045798 | 0.873312 |
| rs13332649  | G  | A  | 0.783 | -0.315                       | 0.038 | 5.43E-17 | -0.10254       | 0.048895 | 0.035977 |
| rs1464446   | T  | G  | 0.183 | -0.329                       | 0.04  | 2.79E-16 | 0.013506       | 0.058117 | 0.816231 |
| rs150180633 | T  | C  | 0.014 | 0.928                        | 0.069 | 2.66E-41 | -0.22697       | 0.363886 | 0.532801 |
| rs17849501  | T  | C  | 0.051 | 0.811                        | 0.05  | 1.81E-59 | 0.101186       | 0.115397 | 0.380571 |
| rs2431697   | C  | T  | 0.561 | -0.223                       | 0.029 | 2.60E-14 | -0.07211       | 0.045351 | 0.111816 |
| rs2459611   | T  | C  | 0.107 | 0.261                        | 0.045 | 7.62E-09 | 0.080092       | 0.099685 | 0.421715 |
| rs2573219   | C  | A  | 0.907 | 0.588                        | 0.043 | 1.13E-42 | 0.137836       | 0.079978 | 0.084811 |
| rs268124    | T  | C  | 0.269 | 0.186                        | 0.032 | 8.60E-09 | 0.084511       | 0.045577 | 0.063705 |
| rs28361029  | A  | G  | 0.07  | -0.386                       | 0.061 | 3.27E-10 | -0.10698       | 0.101533 | 0.292068 |
| rs34703115  | C  | T  | 0.968 | -0.616                       | 0.105 | 4.08E-09 | 0.09825        | 0.118857 | 0.40845  |
| rs35000415  | T  | C  | 0.114 | 0.588                        | 0.042 | 1.86E-45 | 0.03045        | 0.061599 | 0.621075 |
| rs35251378  | A  | G  | 0.291 | -0.236                       | 0.032 | 3.61E-13 | 0.043253       | 0.050145 | 0.388376 |
| rs353608    | G  | A  | 0.528 | 0.186                        | 0.028 | 2.93E-11 | 0.075051       | 0.044028 | 0.088265 |
| rs3747093   | A  | G  | 0.212 | 0.262                        | 0.035 | 2.88E-14 | -0.04412       | 0.047793 | 0.355903 |
| rs4388254   | T  | C  | 0.049 | 0.378                        | 0.06  | 3.71E-10 | -0.00684       | 0.069857 | 0.92202  |
| rs4661543   | G  | T  | 0.874 | 0.274                        | 0.042 | 9.40E-11 | 0.065768       | 0.08885  | 0.459171 |
| rs4916215   | T  | C  | 0.264 | 0.223                        | 0.034 | 5.07E-11 | -0.01428       | 0.056714 | 0.801204 |
| rs58688157  | G  | A  | 0.738 | -0.223                       | 0.034 | 2.97E-11 | -0.04169       | 0.054918 | 0.447794 |
| rs6671847   | A  | G  | 0.48  | 0.199                        | 0.029 | 6.64E-12 | 0.039654       | 0.044214 | 0.369798 |
| rs73050535  | T  | C  | 0.022 | -0.713                       | 0.124 | 9.11E-09 | -0.46396       | 0.307349 | 0.13116  |
| rs7768653   | T  | C  | 0.398 | -0.207                       | 0.03  | 3.11E-12 | -0.04051       | 0.04468  | 0.364642 |
| rs7823055   | T  | G  | 0.424 | -0.351                       | 0.029 | 1.64E-34 | 0.007517       | 0.044482 | 0.865799 |
| rs9852014   | G  | A  | 0.926 | 0.621                        | 0.049 | 2.26E-36 | -0.01237       | 0.082233 | 0.880447 |

**Table S7 Mendelian randomization analysis of Systemic lupus erythematosus and premature delivery.**

| SNP         | A1 | A2 | EAF   | Systemic lupus erythematosus |       |          | Premature delivery |          |          |
|-------------|----|----|-------|------------------------------|-------|----------|--------------------|----------|----------|
|             |    |    |       | Beta                         | SE    | P-val    | Beta               | SE       | P-val    |
| rs10048743  | T  | G  | 0.137 | -0.231                       | 0.041 | 2.04E-08 | 0.017198           | 0.021622 | 0.426384 |
| rs10200680  | T  | C  | 0.143 | -0.248                       | 0.042 | 4.96E-09 | -0.03902           | 0.022079 | 0.07716  |
| rs1078324   | A  | C  | 0.051 | -0.713                       | 0.078 | 7.11E-20 | -0.06658           | 0.042    | 0.112939 |
| rs10912578  | G  | A  | 0.682 | -0.247                       | 0.031 | 1.65E-15 | -0.01617           | 0.017895 | 0.36626  |
| rs12094036  | C  | T  | 0.923 | -0.329                       | 0.058 | 1.37E-08 | 0.000555           | 0.028751 | 0.984586 |
| rs12524498  | T  | G  | 0.019 | -0.673                       | 0.121 | 2.48E-08 | 0.003134           | 0.060128 | 0.958433 |
| rs13136219  | T  | C  | 0.377 | -0.174                       | 0.028 | 3.50E-10 | 0.005136           | 0.017256 | 0.765976 |
| rs13332649  | G  | A  | 0.783 | -0.315                       | 0.038 | 5.43E-17 | -0.01588           | 0.018522 | 0.391255 |
| rs1464446   | T  | G  | 0.183 | -0.329                       | 0.04  | 2.79E-16 | -0.03168           | 0.021893 | 0.147908 |
| rs150180633 | T  | C  | 0.014 | 0.928                        | 0.069 | 2.66E-41 | -0.0021            | 0.137319 | 0.987793 |
| rs17849501  | T  | C  | 0.051 | 0.811                        | 0.05  | 1.81E-59 | 0.065193           | 0.043435 | 0.133373 |
| rs2431697   | C  | T  | 0.561 | -0.223                       | 0.029 | 2.60E-14 | -0.01596           | 0.017059 | 0.349513 |
| rs2459611   | T  | C  | 0.107 | 0.261                        | 0.045 | 7.62E-09 | 0.04041            | 0.037516 | 0.281416 |
| rs2573219   | C  | A  | 0.907 | 0.588                        | 0.043 | 1.13E-42 | -0.01747           | 0.03019  | 0.562727 |
| rs268124    | T  | C  | 0.269 | 0.186                        | 0.032 | 8.60E-09 | -0.01349           | 0.017156 | 0.431566 |
| rs34703115  | C  | T  | 0.968 | -0.616                       | 0.105 | 4.08E-09 | -0.00628           | 0.045635 | 0.890499 |
| rs35000415  | T  | C  | 0.114 | 0.588                        | 0.042 | 1.86E-45 | 0.012536           | 0.023166 | 0.588402 |
| rs35251378  | A  | G  | 0.291 | -0.236                       | 0.032 | 3.61E-13 | -0.03379           | 0.018971 | 0.074862 |
| rs353608    | G  | A  | 0.528 | 0.186                        | 0.028 | 2.93E-11 | 0.014457           | 0.016634 | 0.384773 |
| rs3747093   | A  | G  | 0.212 | 0.262                        | 0.035 | 2.88E-14 | -0.00347           | 0.017963 | 0.846667 |
| rs4388254   | T  | C  | 0.049 | 0.378                        | 0.06  | 3.71E-10 | -0.02043           | 0.026236 | 0.436131 |
| rs4661543   | G  | T  | 0.874 | 0.274                        | 0.042 | 9.40E-11 | -0.02704           | 0.033753 | 0.423122 |
| rs4916215   | T  | C  | 0.264 | 0.223                        | 0.034 | 5.07E-11 | 0.026777           | 0.021528 | 0.213569 |
| rs58688157  | G  | A  | 0.738 | -0.223                       | 0.034 | 2.97E-11 | -0.02547           | 0.020703 | 0.218619 |
| rs6889239   | C  | T  | 0.747 | 0.278                        | 0.032 | 2.19E-18 | 0.007889           | 0.01842  | 0.668447 |
| rs73050535  | T  | C  | 0.022 | -0.713                       | 0.124 | 9.11E-09 | -0.19089           | 0.117171 | 0.103282 |
| rs73068668  | A  | G  | 0.076 | -0.315                       | 0.057 | 4.40E-08 | 0.03141            | 0.030269 | 0.299411 |
| rs7768653   | T  | C  | 0.398 | -0.207                       | 0.03  | 3.11E-12 | -0.00914           | 0.016843 | 0.587511 |
| rs7823055   | T  | G  | 0.424 | -0.351                       | 0.029 | 1.64E-34 | -0.03723           | 0.01676  | 0.026333 |
| rs9852014   | G  | A  | 0.926 | 0.621                        | 0.049 | 2.26E-36 | -0.01686           | 0.030687 | 0.582787 |



**Table S8 Mendelian randomization analysis of Systemic lupus erythematosus and prolonged pregnancy.**

| SNP         | A1 | A2 | EAF   | Systemic lupus erythematosus |       |          | Prolonged pregnancy |          |          |
|-------------|----|----|-------|------------------------------|-------|----------|---------------------|----------|----------|
|             |    |    |       | Beta                         | SE    | P-val    | Beta                | SE       | P-val    |
| rs10048743  | T  | G  | 0.137 | -0.231                       | 0.041 | 2.04E-08 | 0.008043            | 0.030348 | 0.79099  |
| rs10200680  | T  | C  | 0.143 | -0.248                       | 0.042 | 4.96E-09 | 0.00965             | 0.030981 | 0.755433 |
| rs1078324   | A  | C  | 0.051 | -0.713                       | 0.078 | 7.11E-20 | 0.063033            | 0.058598 | 0.282067 |
| rs10912578  | G  | A  | 0.682 | -0.247                       | 0.031 | 1.65E-15 | 0.030823            | 0.025143 | 0.220236 |
| rs12094036  | C  | T  | 0.923 | -0.329                       | 0.058 | 1.37E-08 | -0.00522            | 0.040453 | 0.897371 |
| rs12524498  | T  | G  | 0.019 | -0.673                       | 0.121 | 2.48E-08 | -0.08517            | 0.084512 | 0.313539 |
| rs13136219  | T  | C  | 0.377 | -0.174                       | 0.028 | 3.50E-10 | -0.00617            | 0.024191 | 0.798526 |
| rs13332649  | G  | A  | 0.783 | -0.315                       | 0.038 | 5.43E-17 | 0.026708            | 0.025876 | 0.302008 |
| rs1464446   | T  | G  | 0.183 | -0.329                       | 0.04  | 2.79E-16 | 0.031527            | 0.030668 | 0.30393  |
| rs150180633 | T  | C  | 0.014 | 0.928                        | 0.069 | 2.66E-41 | -0.11891            | 0.197188 | 0.546505 |
| rs17849501  | T  | C  | 0.051 | 0.811                        | 0.05  | 1.81E-59 | 0.033653            | 0.06029  | 0.576719 |
| rs2431697   | C  | T  | 0.561 | -0.223                       | 0.029 | 2.60E-14 | 0.009768            | 0.023866 | 0.682326 |
| rs2459611   | T  | C  | 0.107 | 0.261                        | 0.045 | 7.62E-09 | -0.00275            | 0.052148 | 0.957921 |
| rs2573219   | C  | A  | 0.907 | 0.588                        | 0.043 | 1.13E-42 | 0.067086            | 0.04238  | 0.11343  |
| rs268124    | T  | C  | 0.269 | 0.186                        | 0.032 | 8.60E-09 | 0.011176            | 0.024106 | 0.642933 |
| rs34703115  | C  | T  | 0.968 | -0.616                       | 0.105 | 4.08E-09 | 0.06709             | 0.063762 | 0.29271  |
| rs35000415  | T  | C  | 0.114 | 0.588                        | 0.042 | 1.86E-45 | -0.04001            | 0.032671 | 0.220753 |
| rs35251378  | A  | G  | 0.291 | -0.236                       | 0.032 | 3.61E-13 | 0.029249            | 0.02647  | 0.269158 |
| rs353608    | G  | A  | 0.528 | 0.186                        | 0.028 | 2.93E-11 | -0.00351            | 0.023294 | 0.880286 |
| rs3747093   | A  | G  | 0.212 | 0.262                        | 0.035 | 2.88E-14 | 0.008544            | 0.025213 | 0.734695 |
| rs4388254   | T  | C  | 0.049 | 0.378                        | 0.06  | 3.71E-10 | -0.00732            | 0.036785 | 0.842284 |
| rs4661543   | G  | T  | 0.874 | 0.274                        | 0.042 | 9.40E-11 | 0.012632            | 0.046771 | 0.787097 |
| rs4916215   | T  | C  | 0.264 | 0.223                        | 0.034 | 5.07E-11 | 0.030885            | 0.030088 | 0.304661 |
| rs58688157  | G  | A  | 0.738 | -0.223                       | 0.034 | 2.97E-11 | -0.04666            | 0.02898  | 0.107416 |
| rs6889239   | C  | T  | 0.747 | 0.278                        | 0.032 | 2.19E-18 | -0.00387            | 0.025785 | 0.880844 |
| rs73050535  | T  | C  | 0.022 | -0.713                       | 0.124 | 9.11E-09 | 0.038746            | 0.162742 | 0.811818 |
| rs73068668  | A  | G  | 0.076 | -0.315                       | 0.057 | 4.40E-08 | 0.0151              | 0.042259 | 0.720857 |
| rs7768653   | T  | C  | 0.398 | -0.207                       | 0.03  | 3.11E-12 | -0.04291            | 0.023643 | 0.069525 |
| rs7823055   | T  | G  | 0.424 | -0.351                       | 0.029 | 1.64E-34 | -0.01814            | 0.023487 | 0.440016 |
| rs9852014   | G  | A  | 0.926 | 0.621                        | 0.049 | 2.26E-36 | 0.06651             | 0.042926 | 0.121285 |

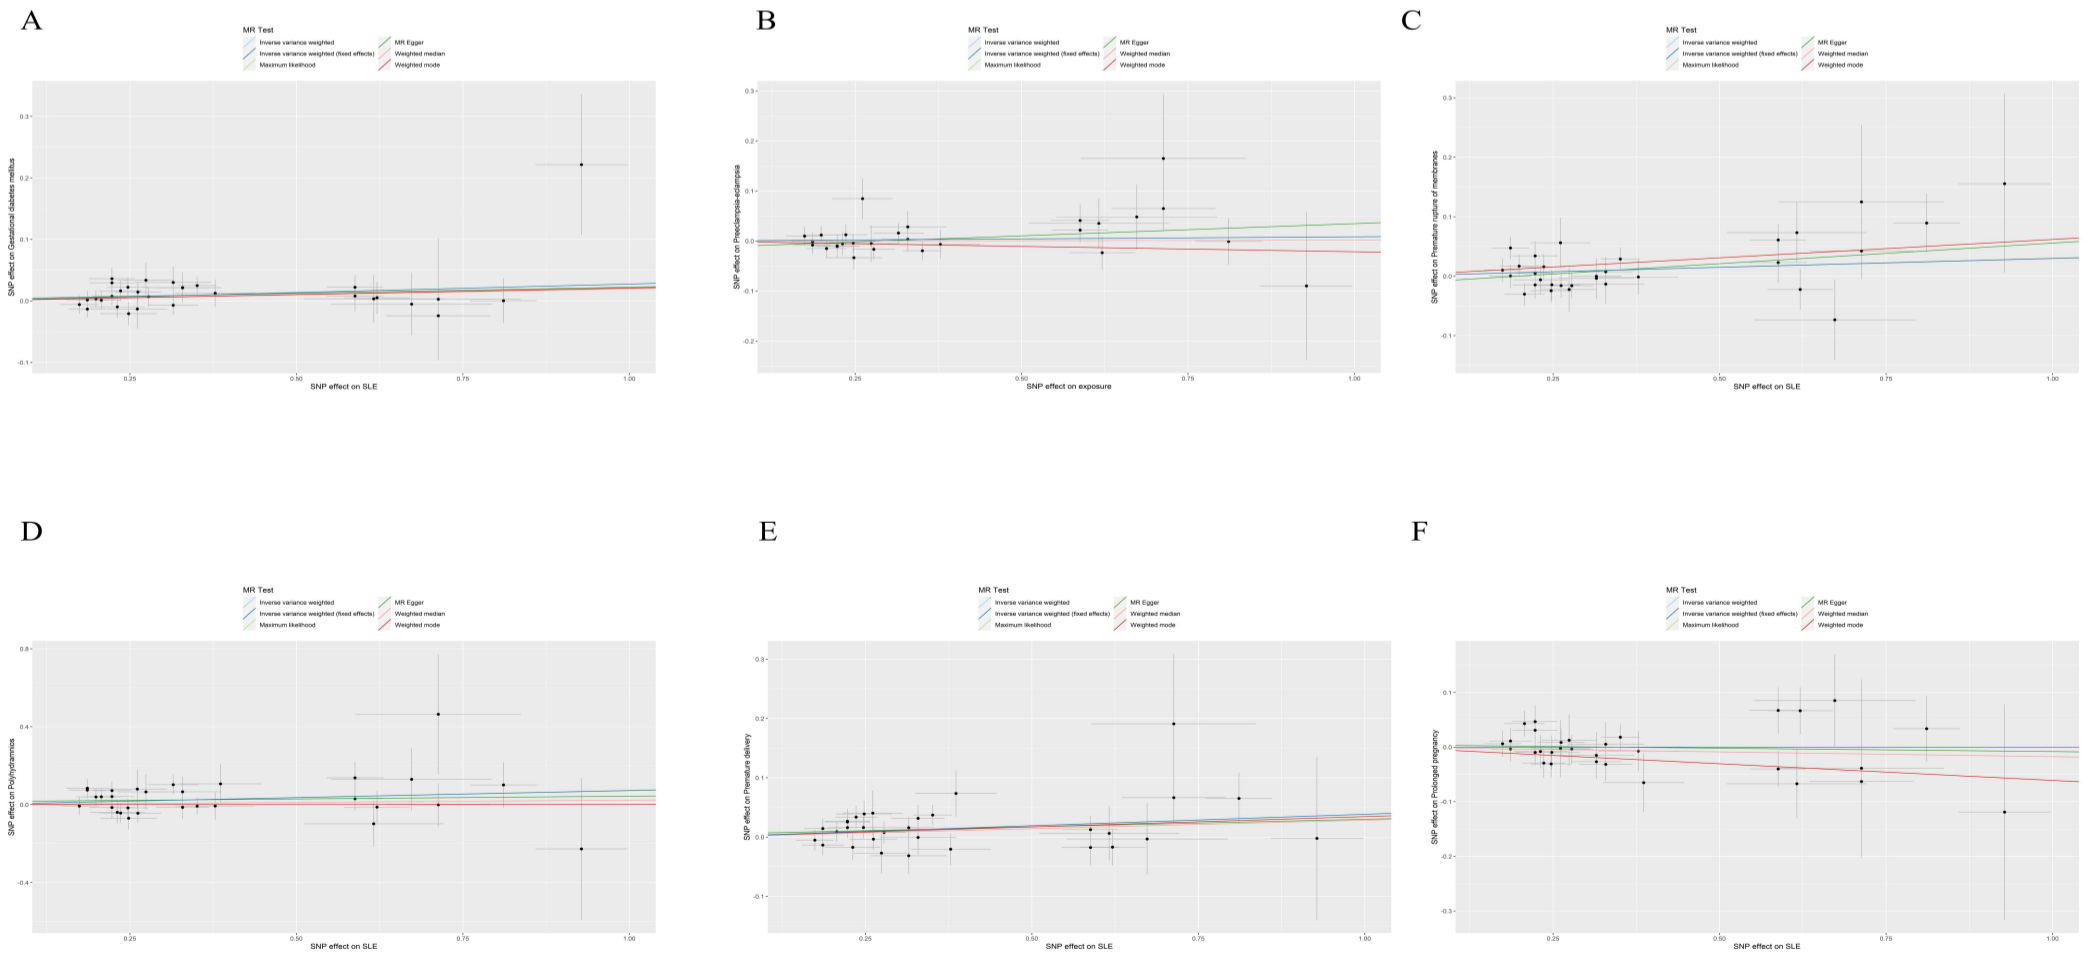

**Supporting Information Figure S1:** Scatter plot (A) SLE and gestational diabetes mellitus; (B) SLE and preeclampsia-eclampsia; (C) SLE and premature rupture of membranes; (D) SLE and polyhydramnios; (E) SLE and premature delivery; (F) SLE and prolonged pregnancy

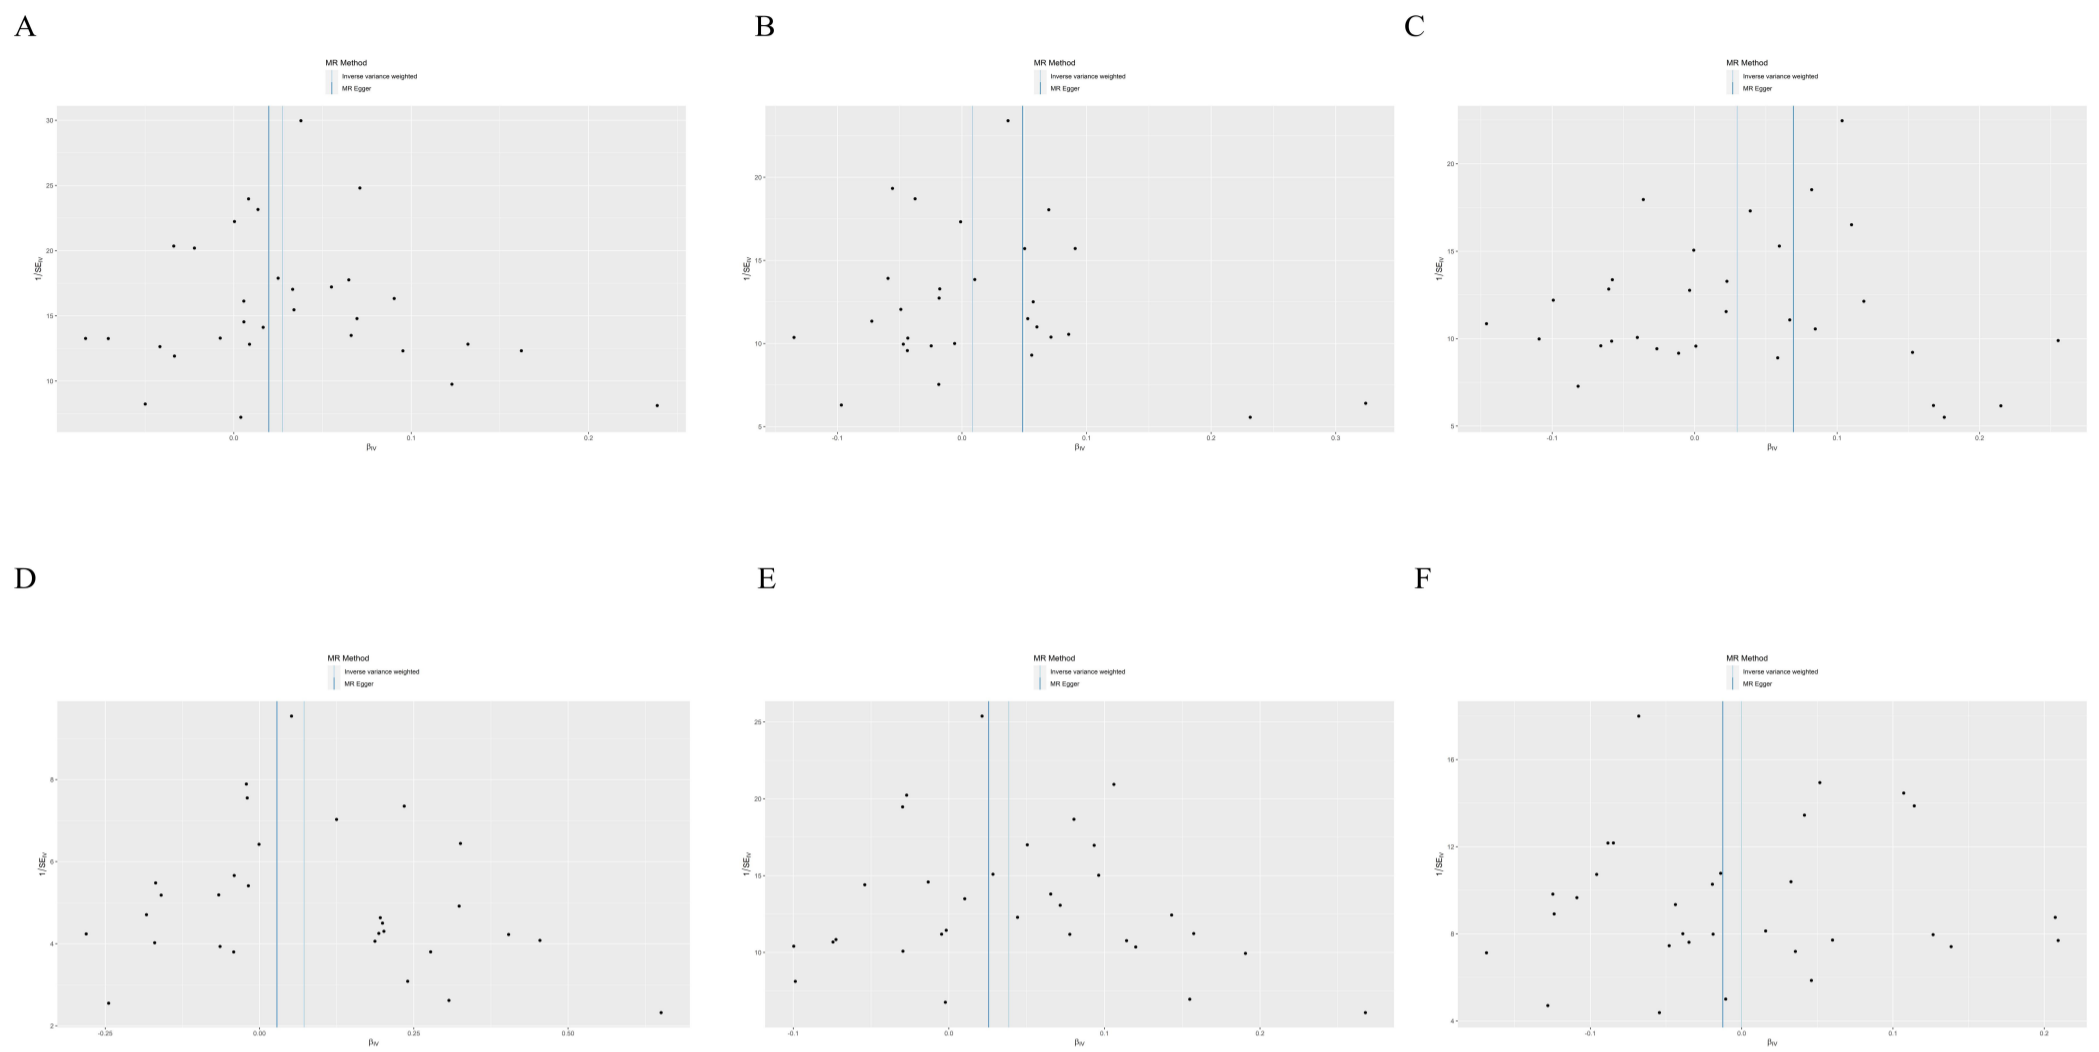

**Supporting Information Figure S2:** Funnel plot (A) SLE and gestational diabetes mellitus; (B) SLE and preeclampsia-eclampsia; (C) SLE and premature rupture of membranes; (D) SLE and polyhydramnios; (E) SLE and premature delivery; (F) SLE and prolonged pregnancy

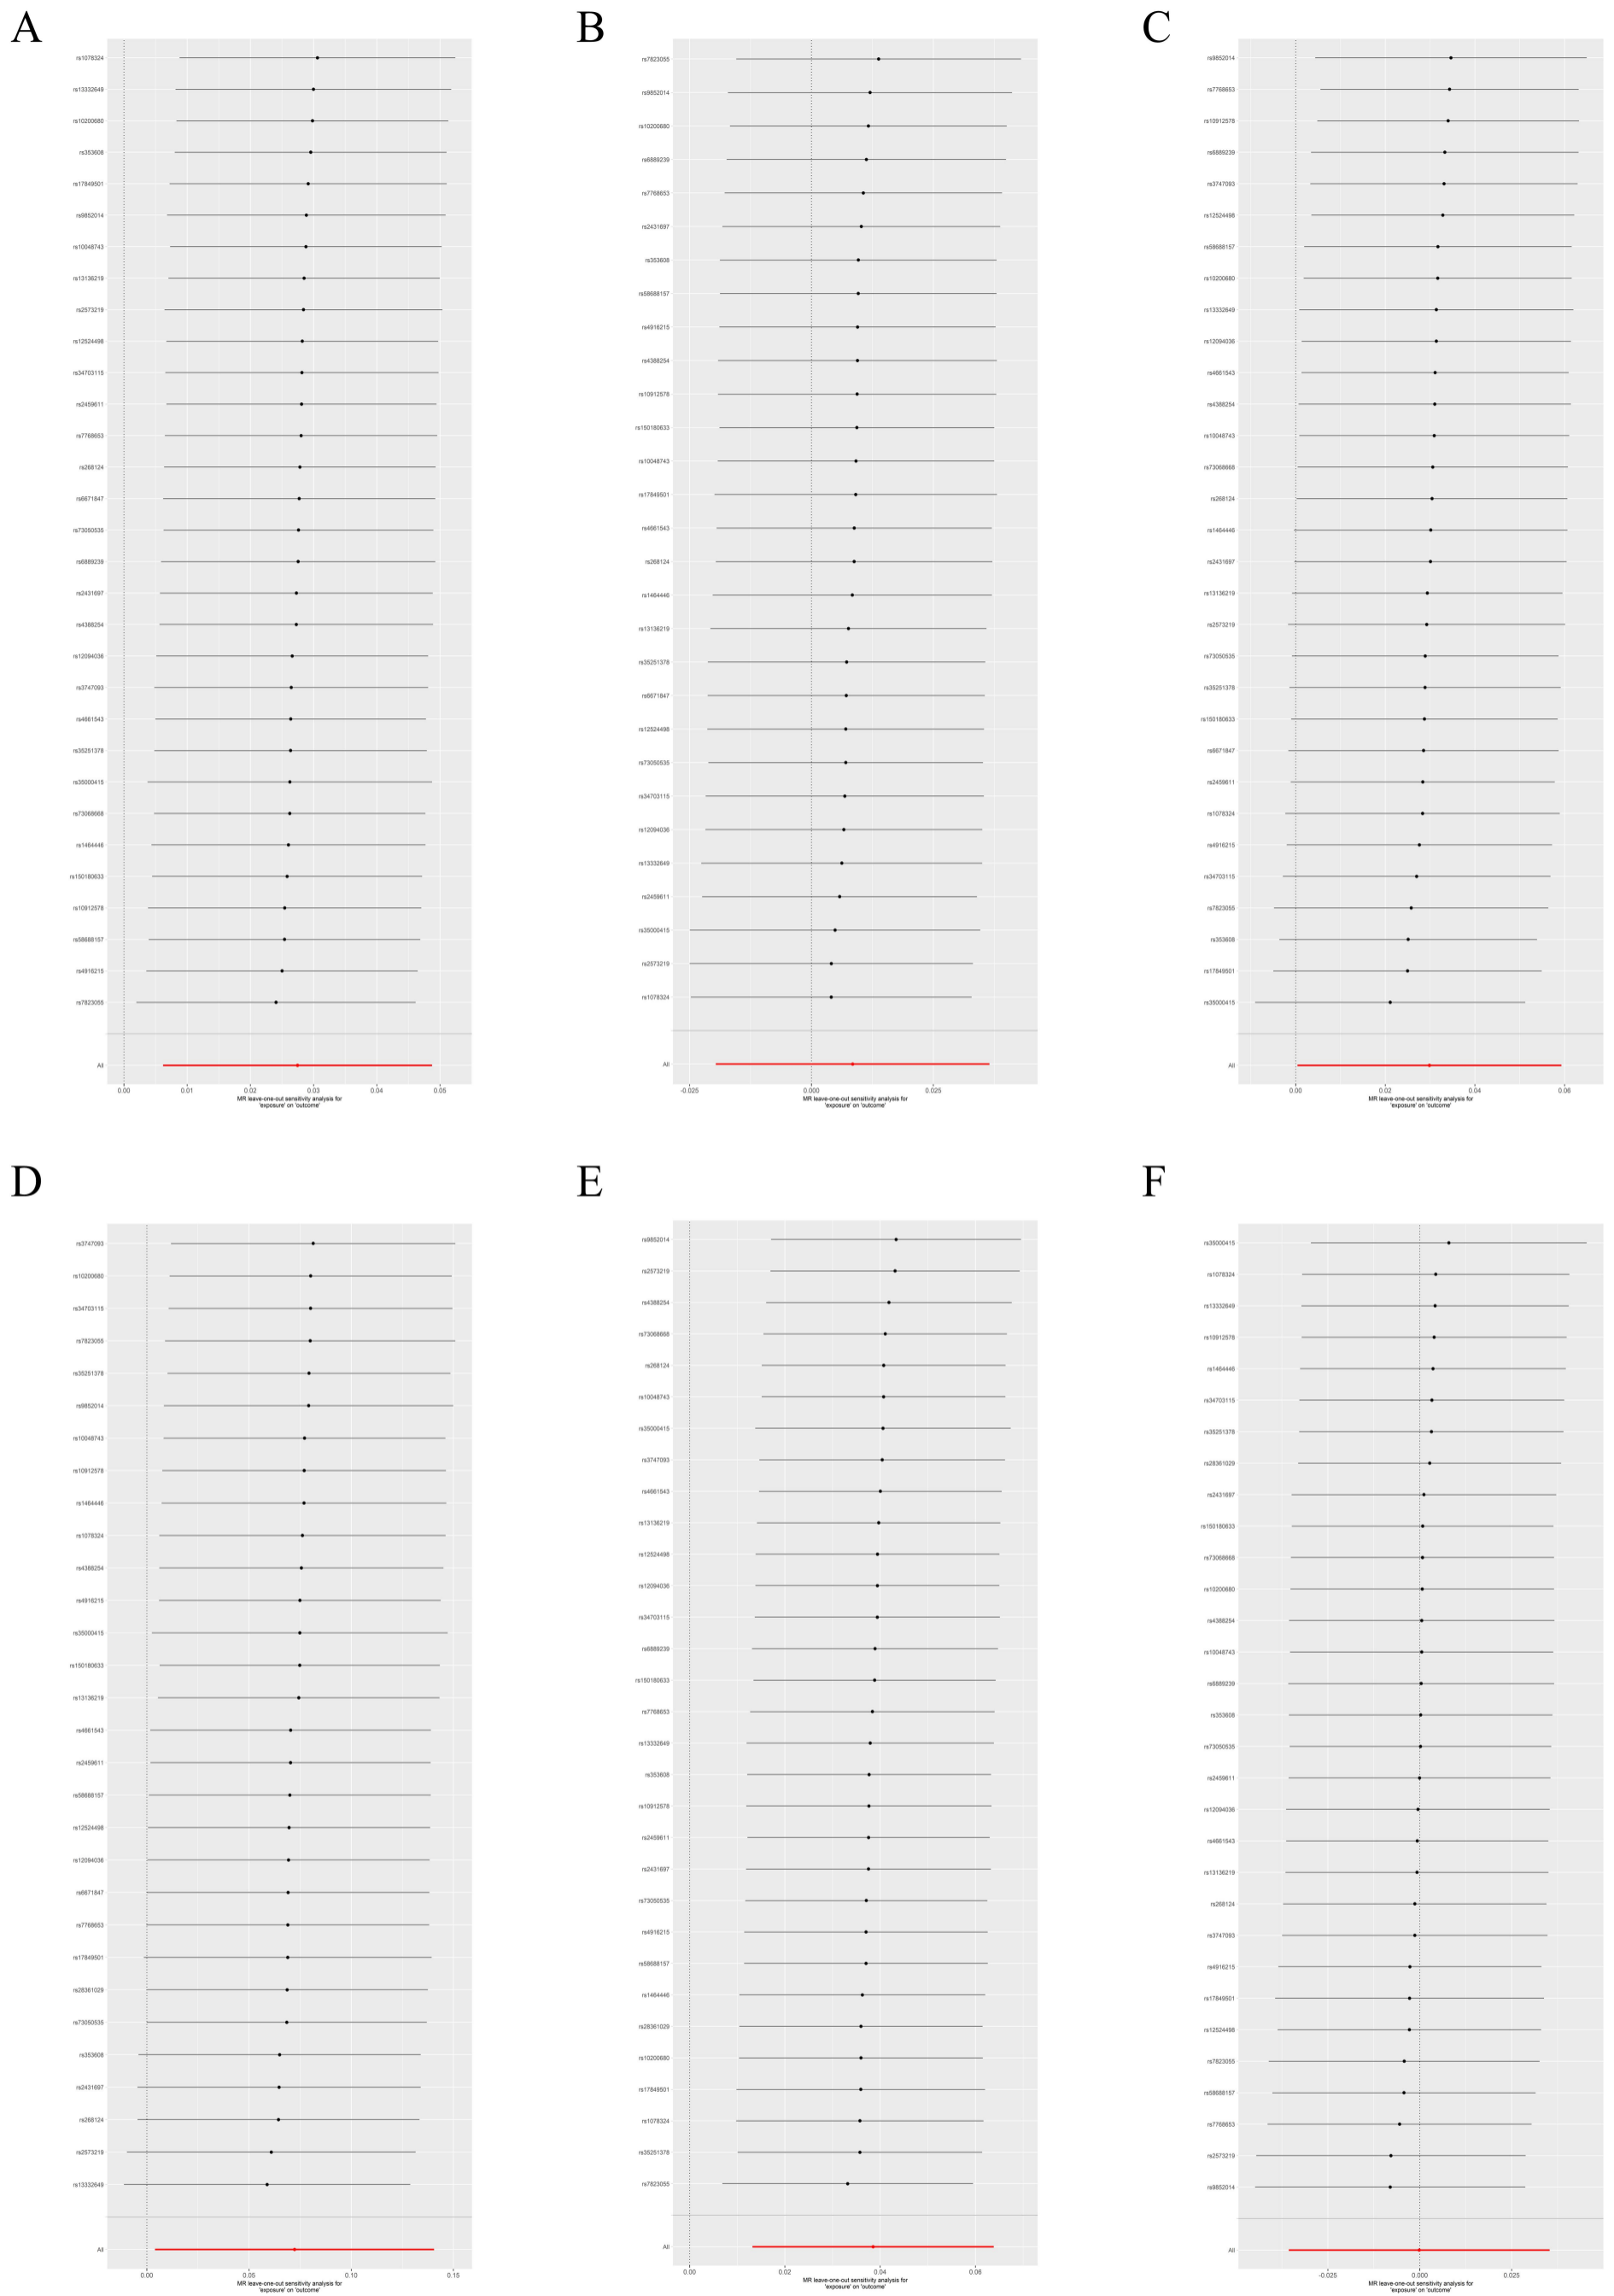

**Supporting Information Figure S3:** Leave-one-out sensitivity analysis: (A) SLE and gestational diabetes mellitus; (B) SLE and preeclampsia-eclampsia; (C) SLE and premature rupture of membranes; (D) SLE and polyhydramnios; (E) SLE and premature delivery; (F) SLE and prolonged pregnancy.
